# Supplementary material
Source: publisher figshare collection journal article supplement (https://karger.figshare.com/ndownloader/files/12418652)

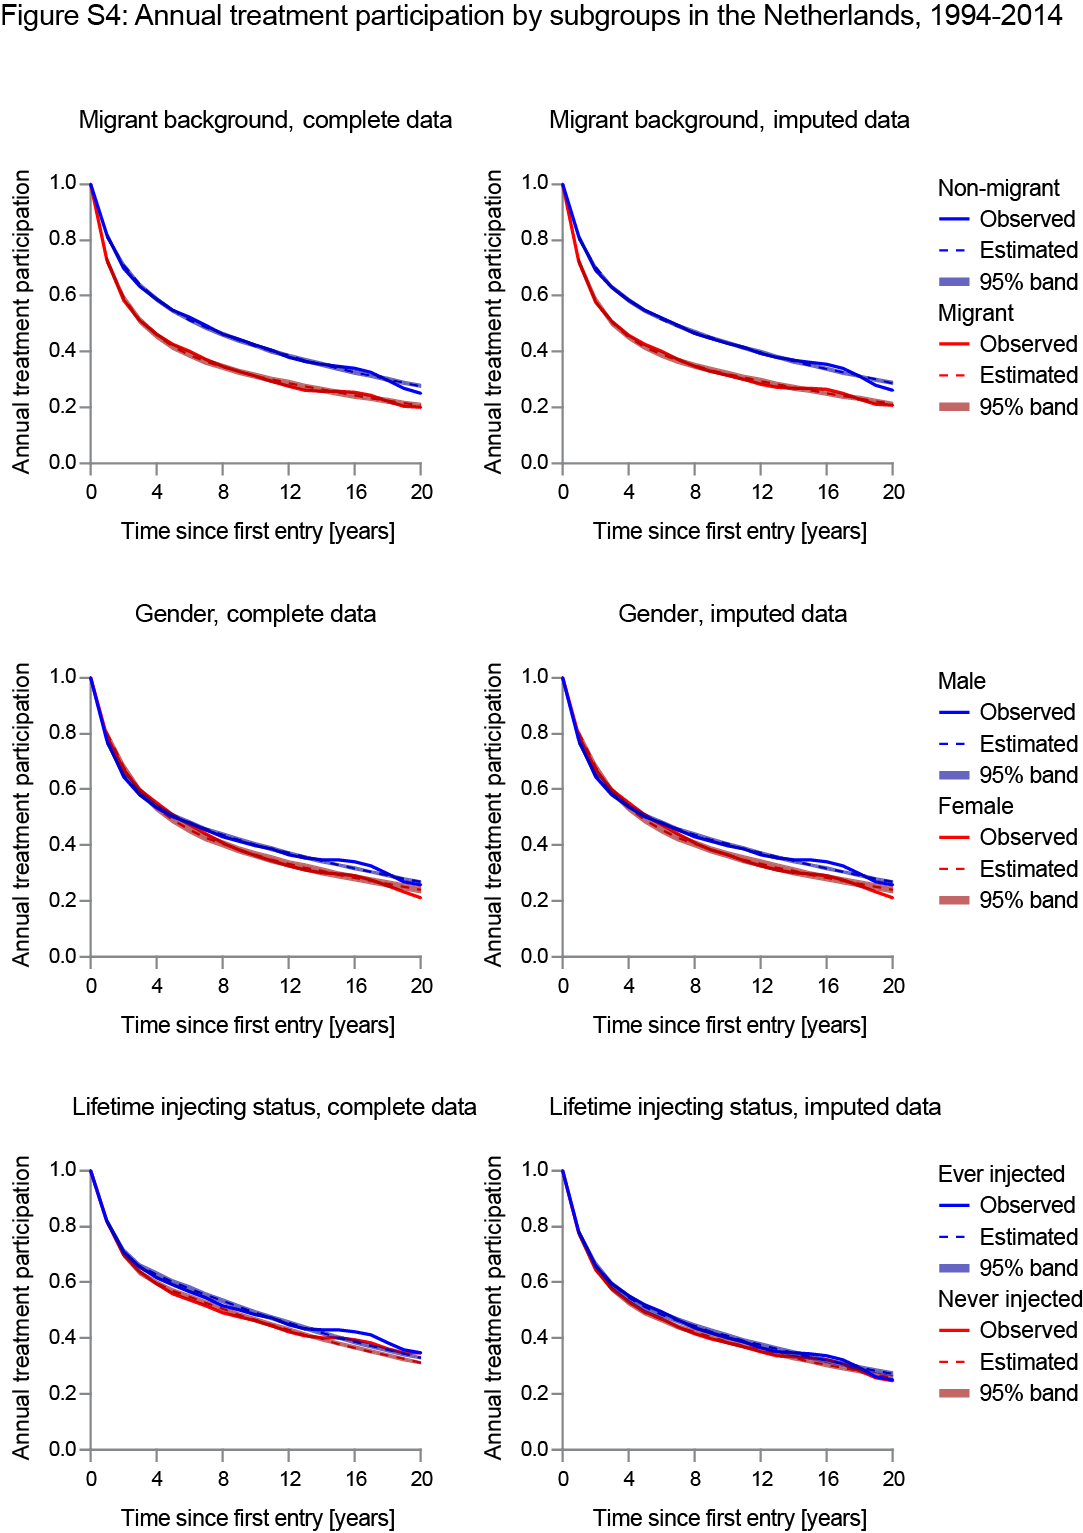

Supplement: Supplementary file 1 [file 12418652]
